# Supplementary material for: Lab-on-valve combined with a kinetic-matching approach for fast evaluation of total antioxidant capacity in wines
Source: Royal Society of Chemistry journal article supplement (doi:10.1039/c3ay42185f), 2014-01-01
Supplement: c3ay42185f1.pdf [file c3ay42185f1.pdf]

## Analytical Methods

### Electronic supplementary information

#### **Lab-on-valve combined to kinetic-matching approach for fast evaluation of total antioxidant capacity in wines**

Inês I. Ramos, Miguel A. Maia, Salette Reis, Luís M. Magalhães and Marcela A. Segundo\*

REQUIMTE, Departamento de Ciências Químicas, Faculdade de Farmácia, Universidade do  
Porto, Rua de Jorge Viterbo Ferreira, 228, 4050-313 Porto, Portugal

\*Corresponding author. E-mail: msegundo@ff.up.pt, Tel: +351 220428676, Fax: +351  
226093483.

**Table S1.** Dispersion coefficients (*D*) obtained for different points of sample peak profile (Fig. 2).

|                                     | Volume / $\mu\text{l}$ | A <sup>c</sup> | B <sup>d</sup> | C <sup>e</sup> | D <sup>e</sup> |
|-------------------------------------|------------------------|----------------|----------------|----------------|----------------|
| <b><i>D</i> sample<sup>a</sup></b>  | 1                      | 84.3           | 37.9           | 47.5           | 197.4          |
|                                     | 2                      | 31.4           | 28.0           | 29.4           | 81.3           |
|                                     | 5                      | 12.0           | 10.3           | 11.3           | 16.1           |
| <b><i>D</i> reagent<sup>b</sup></b> | 1                      | 1.06           | 1.07           | 1.06           | 1.00           |
|                                     | 2                      | 1.09           | 1.13           | 1.11           | 1.02           |
|                                     | 5                      | 1.06           | 1.28           | 1.26           | 1.05           |

<sup>a</sup> Dispersion coefficient of sample plug was assessed using BTB solution as sample and borax solution (0.01 M) as carrier.

<sup>b</sup> Dispersion coefficient of reagent was assessed using borax as sample and BTB as carrier/reagent. For both experiments: carrier flow rate  $1.25 \mu\text{l s}^{-1}$ , sample aspiration flow rate  $2 \mu\text{l s}^{-1}$ .

<sup>c</sup> Dispersion coefficient values obtained at 50% of maximum peak height before the peak maximum.

<sup>d</sup> Dispersion coefficient values determined at peak maximum.

<sup>e</sup> Dispersion coefficient values determined at 85 (C) and 25 (D) % of maximum peak height after peak maximum.

**Table S2.** Relative standard deviation (RSD) values of the analytical signal obtained for different points of sample peak profile, using different injection volumes.

|                            | Volume / $\mu\text{l}$ | A <sup>c</sup> | B <sup>d</sup> | C <sup>e</sup> | D <sup>e</sup> |
|----------------------------|------------------------|----------------|----------------|----------------|----------------|
| <b>Sample<sup>a</sup></b>  | 1                      | 19.3           | 4.3            | 5.8            | 10.4           |
|                            | 2                      | 4.2            | 1.1            | 2.3            | 11.3           |
|                            | 5                      | 1.7            | 0.9            | 1.2            | 2.5            |
| <b>Reagent<sup>b</sup></b> | 1                      | 3.9            | 2.8            | 8.1            | 20.8           |
|                            | 2                      | 6.0            | 2.0            | 2.2            | 17.8           |
|                            | 5                      | 4.1            | 2.4            | 3.1            | 1.1            |

<sup>a</sup> RSD of analytical signals registered using BTB solution as sample and borax solution (0.01 M) as carrier (n = 4).

<sup>b</sup> RSD of analytical signals registered using borax as sample and BTB as carrier/reagent (n = 4). For both experiments: carrier flow rate 1.25  $\mu\text{l s}^{-1}$ , sample aspiration flow rate 2  $\mu\text{l s}^{-1}$ .

<sup>c</sup> RSD values obtained at 50% of maximum peak height before the peak maximum.

<sup>d</sup> RSD values determined at peak maximum.

<sup>e</sup> RSD values determined at 85 (C) and 25 (D) % of maximum peak height after peak maximum.

**Table S3.** ABTS/Trolox ratio<sup>a</sup> obtained for different points of sample peak profile (Fig. 2, A-D).

| <b>Volume /<math>\mu</math>l</b> | <b>A</b>  | <b>B</b>  | <b>C</b> | <b>D</b> |
|----------------------------------|-----------|-----------|----------|----------|
| 1                                | 27.8-222  | 12.4-99.2 | 15.8-126 | 68.6-549 |
| 2                                | 10.1-80.8 | 8.7-69.6  | 9.3-74.4 | 27.9-223 |
| 5                                | 4.0-32.0  | 2.8-22.4  | 3.1-24.8 | 5.4-43.2 |

<sup>a</sup> Ratio values were calculated considering the upper (200  $\mu$ M) and the lower (25  $\mu$ M) limit of the calibration curve established for Trolox, using a 70  $\mu$ M ABTS carrier solution.

**Table S4.** Total antioxidant capacity<sup>a</sup> of red wine samples obtained by LOV-kinetic matching approach and by microplate endpoint procedure.

| Sample | LOV-Kinetic<br>matching approach |            |            | Microplate |
|--------|----------------------------------|------------|------------|------------|
|        | 10 s                             | 30 s       | 60 s       | 300 min    |
| A      | 26.7 ± 4.0                       | 27.2 ± 3.2 | 27.3 ± 3.1 | 29.4 ± 0.6 |
| B      | 19.4 ± 3.2                       | 20.3 ± 2.1 | 21.0 ± 2.0 | 23.9 ± 0.9 |
| C      | 27.7 ± 3.2                       | 29.5 ± 3.4 | 31.2 ± 2.9 | 29.9 ± 0.8 |
| D      | 29.6 ± 4.1                       | 32.6 ± 3.0 | 34.4 ± 3.0 | 31.6 ± 0.6 |
| E      | 25.3 ± 3.6                       | 29.0 ± 2.9 | 31.4 ± 3.4 | 29.7 ± 0.5 |
| F      | 21.9 ± 6.6                       | 23.3 ± 0.9 | 24.4 ± 1.2 | 28.0 ± 1.3 |

<sup>a</sup> Antioxidant capacity values are expressed as TEAC, mM (mean value ± standard deviation, *n* = 4).

**Table S5.** Values for determination throughput, sample volume, ABTS consumption and effluent produced per determination in the LOV-ABTS system compared to previously proposed flow systems.

|                                      | This work | Ref. #10                         | Ref. #11                       | Ref. #12                             | Ref. #13             | Ref. #14                                                                  | Ref. #15                                           | Ref. #16              |
|--------------------------------------|-----------|----------------------------------|--------------------------------|--------------------------------------|----------------------|---------------------------------------------------------------------------|----------------------------------------------------|-----------------------|
| ABTS consumption (nmol)              | 6.8       | 112                              | n. a.                          | 184                                  | 356                  | 1800                                                                      | 25.2                                               | 3.5                   |
| Effluent volume (ml)                 | 0.098     | 1.6                              | n. a.                          | 1.15                                 | 1.87                 | 6.90                                                                      | 6.30                                               | n. a.                 |
| Sample volume ( $\mu$ l)             | 1.0       | 20                               | 5                              | 30                                   | 100                  | 100                                                                       | 20-62                                              | 100                   |
| Determination frequency ( $h^{-1}$ ) | 36        | 30                               | 22                             | 120                                  | 32                   | 12                                                                        | 9-20                                               | 42                    |
| Type of flow system                  | LOV/SIA   | FIA                              | FIA                            | FIA                                  | FIA                  | MSFIA                                                                     | SIA                                                | SIA                   |
| Samples                              | Red wine  | Juices,<br>lemon tea<br>and beer | Plasma,<br>wine,<br>mouthrinse | Standard<br>antioxidant<br>compounds | Wine,<br>coffee, tea | Red and<br>white wine,<br>herbal and<br>tea<br>infusions,<br>juices, beer | Fruit<br>juices, tea,<br>milk,<br>yoghurt,<br>beer | Red and<br>white wine |

n. a.: not available.
